# Supplementary material for: Preparation and characterization of novel polyoxometalate/CoFe2O4/metal–organic framework magnetic core–shell nanocomposites for the rapid removal of organic dyes from water
Source: PubMed Central journal article supplement — RSC Adv. 2020 Nov 2;10(65):39881–93. doi: 10.1039/d0ra04603e (PMC9057400; doi:10.1039/d0ra04603e), 2020-11-02
Supplement: RA-010-D0RA04603E-s001.pdf [file RA-010-D0RA04603E-s001.pdf]

## Supplementary information

### Preparation and characterization of novel polyoxometalate/CoFe<sub>2</sub>O<sub>4</sub>/metal–organic framework magnetic core-shell nanocomposites for rapid removal of organic dyes from water

Afsoon Jarrah and Saeed Farhadi\*

Department of Chemistry, Lorestan University, Khorramabad, 68151-44316, Iran

\*Corresponding author: E-mails: farhadi.s@lu.ac.ir

### Equations used for thermodynamic and kinetic models in this work:

$$\frac{C_e}{q_e} = \frac{C_e}{q_m} + \frac{1}{q_m K_L} \quad (\text{Eq. S1})$$

Where  $K_L$ ,  $q_m$ , and  $C_e$  are the Langmuir constant ( $\text{mg l}^{-1}$ ), high adsorption capacity ( $\text{mg g}^{-1}$ ), and the equilibrium concentration of pollutant solution ( $\text{mg l}^{-1}$ ), respectively, that  $q_m$  and  $K_L$  were calculated from the intercept and slope of isotherm plots.

$$R_L = \frac{1}{1 + K_L C_0} \quad (\text{Eq. S2})$$

Where  $C_0$  is the primary dye concentration, the  $R_L$  factor offers the kind of the isotherm to be favorable ( $0 < R_L < 1$ ), irreversible ( $R_L = 0$ ), linear ( $R_L = 1$ ), or unfavorable ( $R_L > 1$  or  $R_L < 0$ ).

$$\text{Log} q_e = \text{Log} k_f + \frac{1}{n} \cdot \text{Log} C_e \quad (\text{Eq. S3})$$

Where  $n$  and  $K_f$  ( $\text{mg/g}$ ) indicate heterogeneity factor and Freundlich constant connecting to the adsorption intensity and capacity, respectively.

$$\ln(q_e - q_t) = \ln q_e - k_1 t \quad (\text{Eq. S4})$$

$$\frac{t}{q_t} = \frac{1}{k_2 q_e^2} + \frac{1}{q_e} t \quad (\text{Eq. S5})$$

$$q_t = k_p t^{\frac{1}{2}} + I \quad (\text{Eq.S6})$$

Where  $q_t$  and  $q_e$ (mg/g) are the concentrations of dye adsorbed at any time  $t$  and equilibrium time (min), respectively.  $k_1$ ( $\text{min}^{-1}$ ) and  $k_2$ ( $\text{g mg}^{-1}\text{min}^{-1}$ ) are the rates constants of adsorption for the pseudo-first-order and the pseudo-second-order models respectively, and  $k_p$  ( $\text{mg/g}^{-1}\text{min}^{-1}$ ) and  $I$  are the intraparticle dissemination rate constant and intercept for the first linear phase.

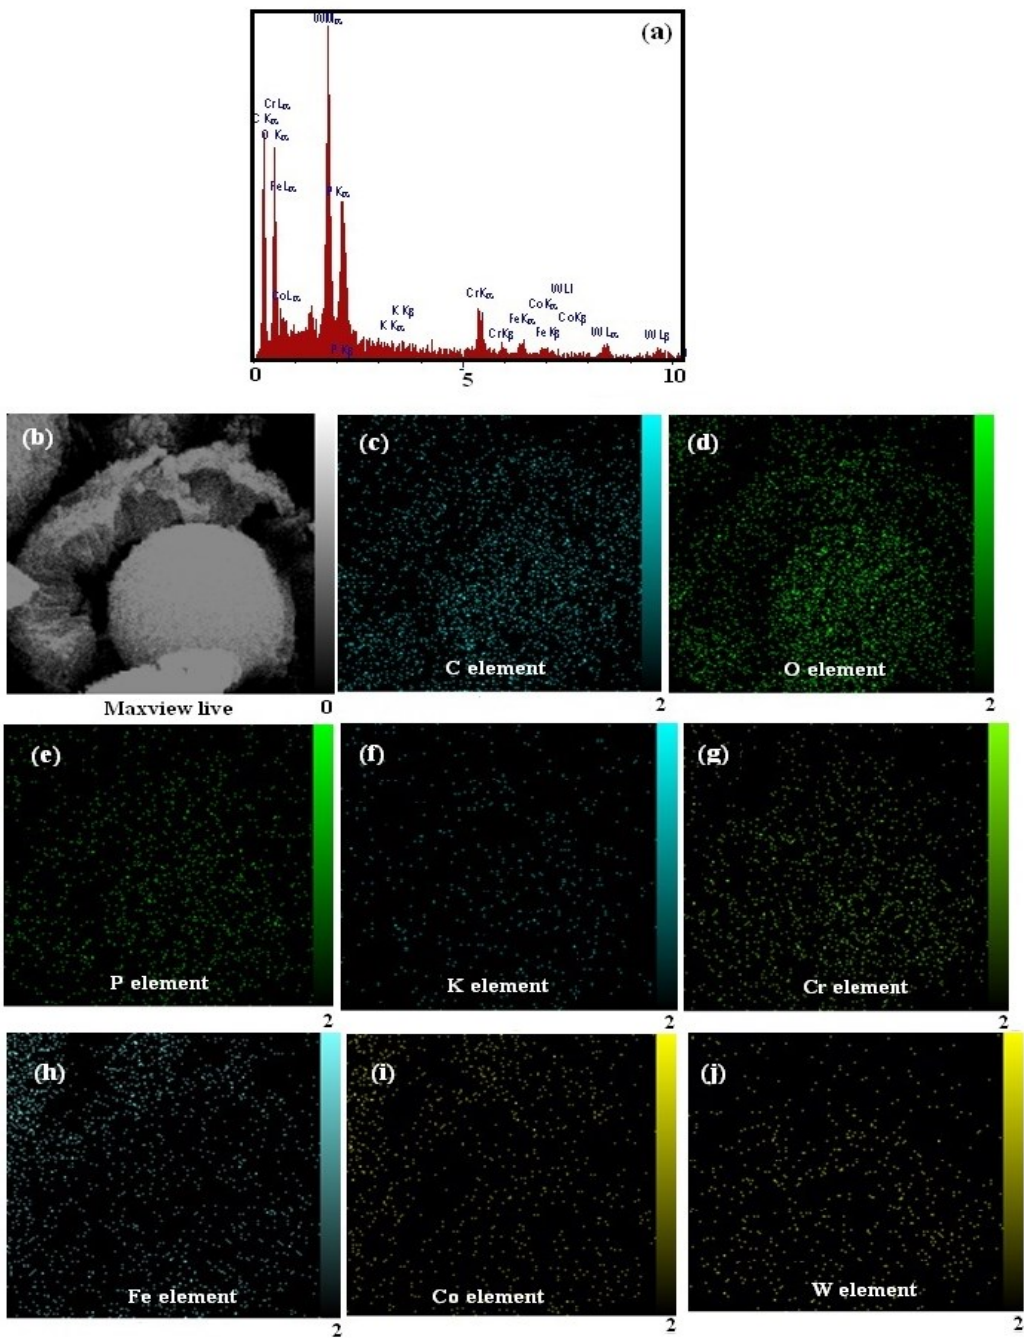

**Fig. S1.** EDX spectrum (a) and a representative SEM image of the POM/CFO/MIL-101(Cr) (b) with corresponding EDX elemental mappings (c)-(j).

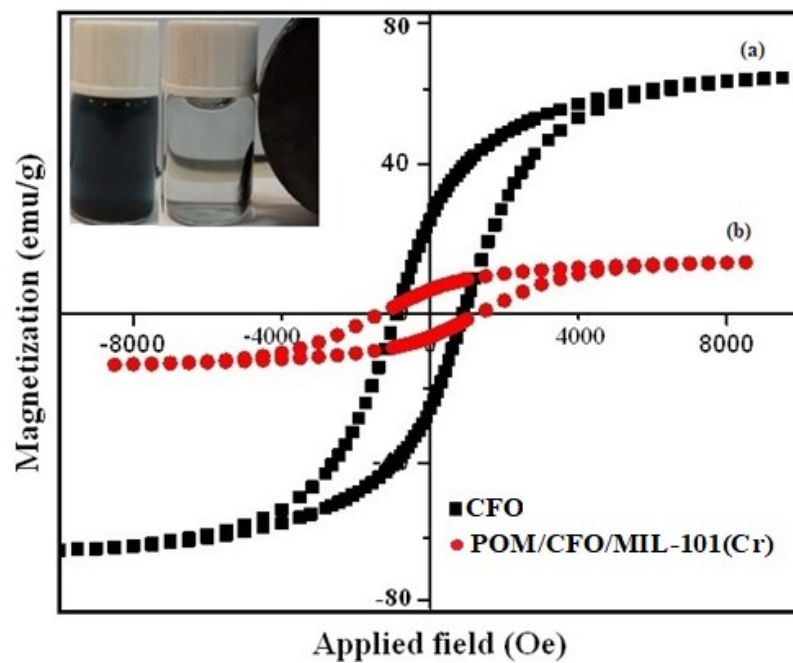

**Fig. S2.** Magnetization curves of CFO (a) and POM/CFO/MIL-101(Cr) (b). The inset shows the use of an outer magnetic field to separate the POM/CFO/MIL-101(Cr) sample.

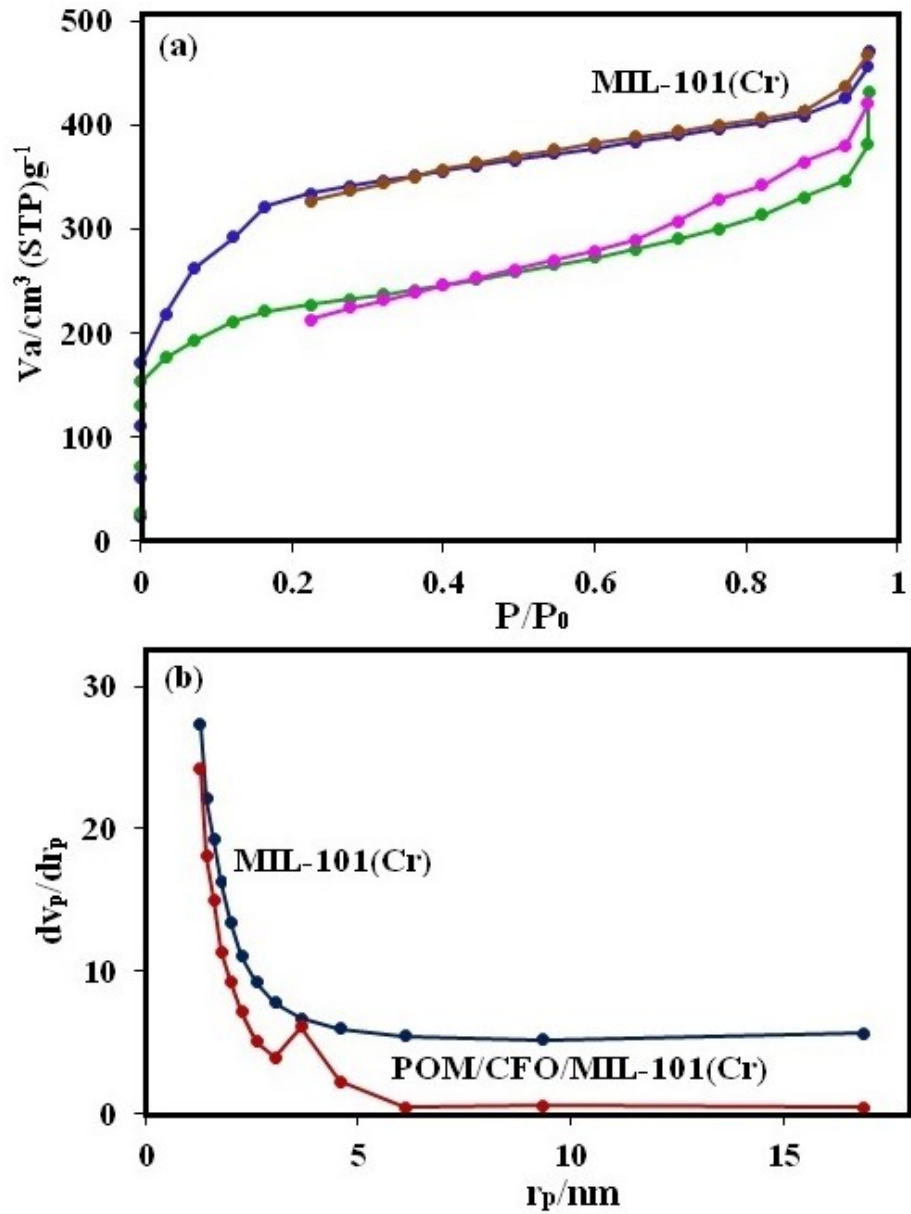

**Fig. S3.** BET isotherms (a) and pore size distributions of MIL-101(Cr) and POM/CFO/MIL-101(Cr) samples.

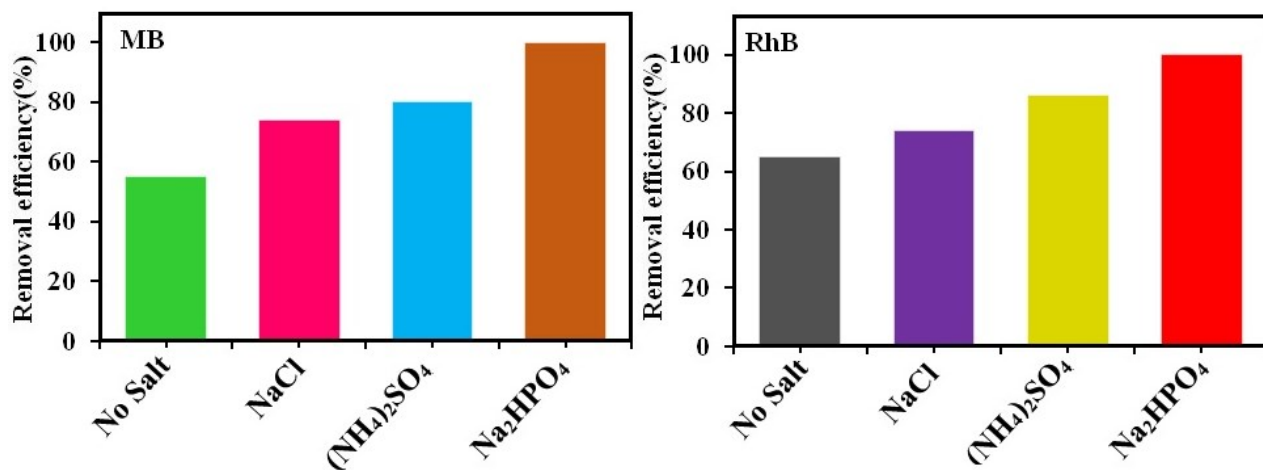

**Fig S4.** the effect of salt on the dye adsorption by the POM/CFO/MIL-101(Cr). Conditions:  $C_{0(\text{MB})} = 100$  mg/L,  $C_{0(\text{RhB})} = 50$  mg/L, adsorbent dose = 30 mg, pH = 6 and temp. = 25 °C. The contact adsorption times for MB and RhB dyes were 20 and 25 min, respectively.

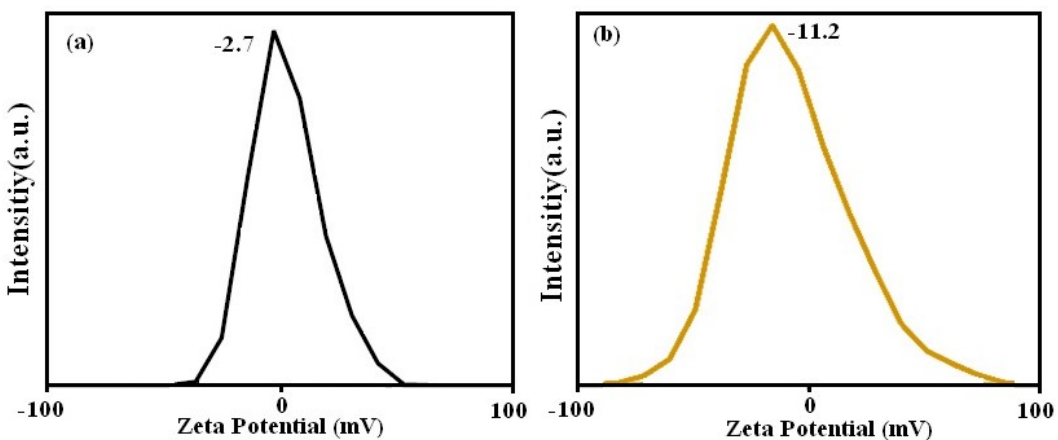

**Fig. S5.** Zeta potential curves of (a) pure MIL-101 and (b) P<sub>2</sub>Mo<sub>18</sub>/MIL-101 (Cr) in aqueous solutions at natural pH of about 6.5.

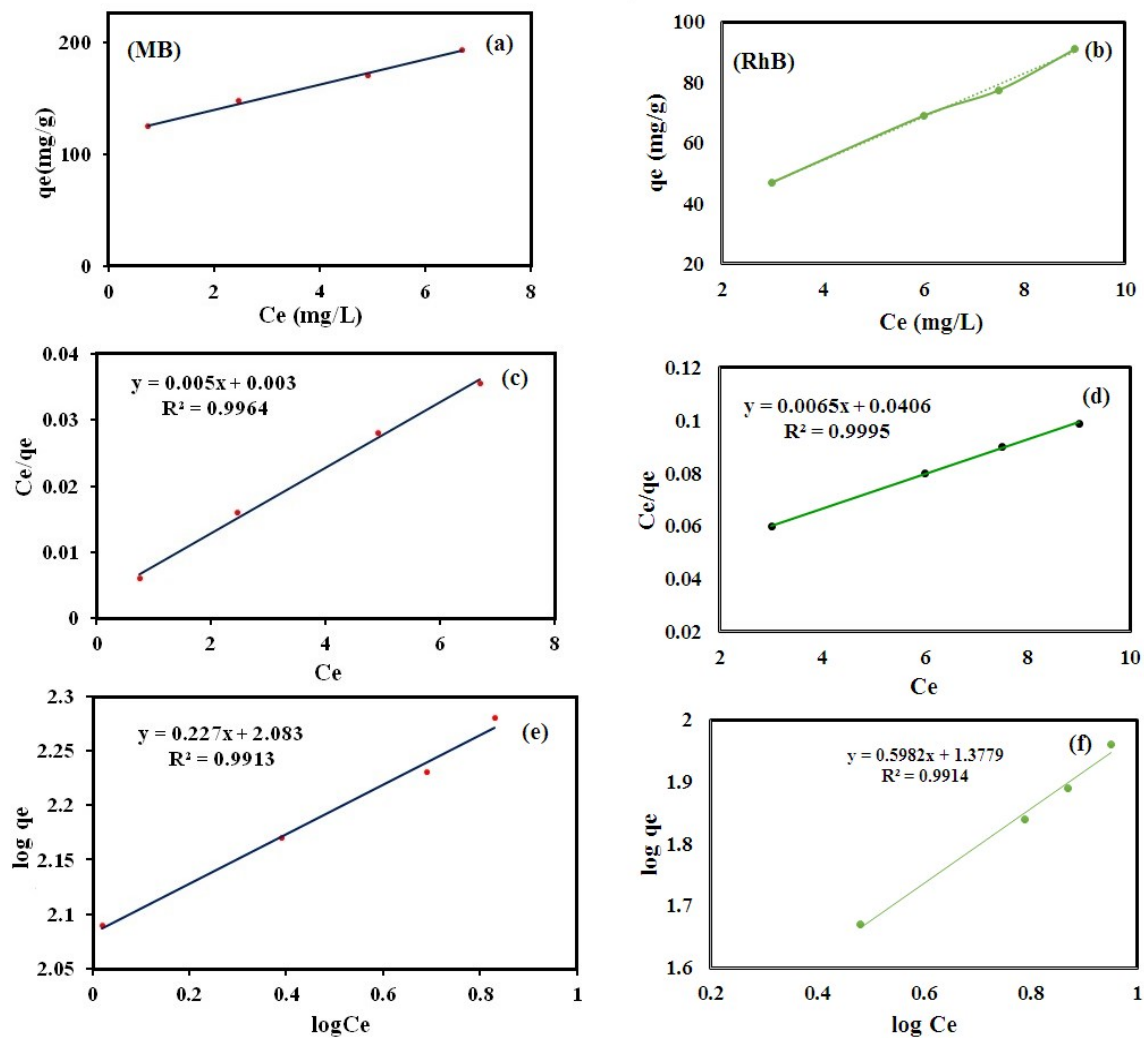

**Fig. S6.** Adsorption isotherm curves of (a) MB and (b) RhB, onto POM/CFO/MIL-101(Cr), (c, d) Langmuir, and (e, f) Freundlich isotherms.

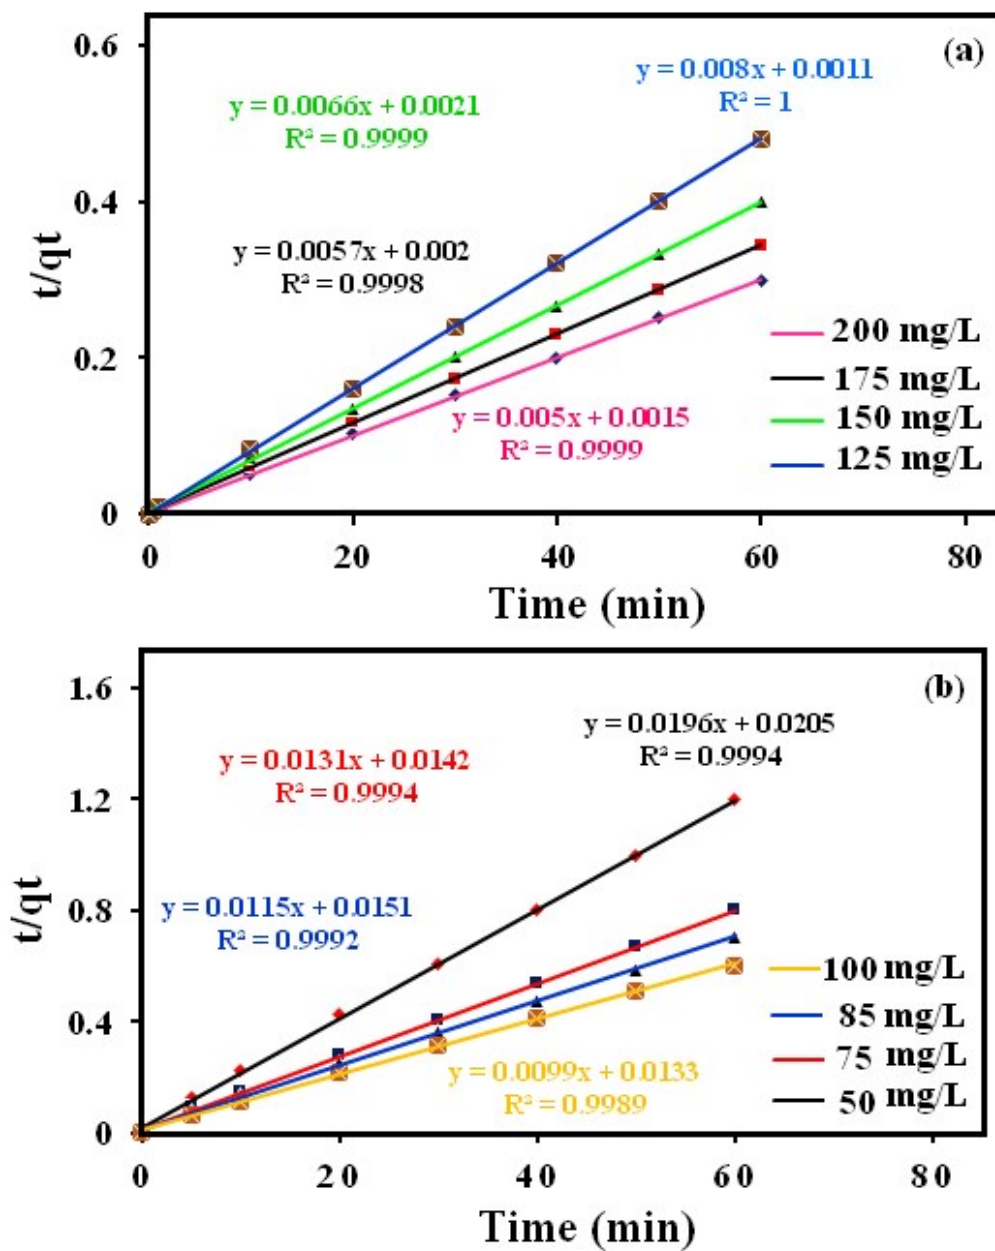

Fig. S7. Pseudo-second order kinetics for MB (a) and RhB (b) adsorptions.



**Table S1.** Comparison of adsorption performance of various adsorbents for MB.

| Adsorbent                                                                                         | Adsorption capacity (mg/g) | $C_{MB}$ (mg L <sup>-1</sup> ) | Time          | Ref.             |
|---------------------------------------------------------------------------------------------------|----------------------------|--------------------------------|---------------|------------------|
| H <sub>6</sub> P <sub>2</sub> W <sub>18</sub> O <sub>62</sub> /MOF-5                              | 51.81                      | 10                             | 10 min        | [48]             |
| MOF/GO                                                                                            | 183.4                      | 36                             | 30 min        | [49]             |
| Mesoporous MIL-101                                                                                | 22.5                       | 30                             | 2 h           | [50]             |
| MOF-235                                                                                           | 187                        | 300                            | 12 h          | [51]             |
| H <sub>3</sub> PW <sub>12</sub> O <sub>40</sub> @Mn <sup>III</sup> porphyrin                      | 10.5                       | 10                             | 24 h          | [52]             |
| MOF-Cu-BTC                                                                                        | 15.28                      | 3.19                           | 6 h           | [53]             |
| H <sub>6</sub> P <sub>2</sub> W <sub>18</sub> O <sub>62</sub> @Cu <sub>3</sub> (BTC) <sub>3</sub> | 18.51                      | 40                             | 1 h           | [54]             |
| Carbon nanotubes                                                                                  | 35.4                       | 35                             | 50 min        | [55]             |
| Activated carbon                                                                                  | 135                        | 60                             | 10 min        | [56]             |
| Exfoliated graphene oxide                                                                         | 17.3                       | 30                             | 80 min        | [57]             |
| Nano-ZIF - 8                                                                                      | 126                        | 60                             | 30 min        | [58]             |
| H <sub>3</sub> PW <sub>12</sub> O <sub>40</sub> / ZIF-8                                           | 298                        | 60                             | 30min         | [58]             |
| H <sub>3</sub> PW <sub>12</sub> O <sub>40</sub> /MIL-101(Fe)                                      | 473.7                      | 100                            | 5 min         | [59]             |
| H <sub>4</sub> PW <sub>11</sub> V/MIL-101(Cr)                                                     | 371                        | 100                            | 30 min        | [60]             |
| PV <sub>2</sub> Mo <sub>10</sub> -M(membrane)                                                     | 82                         | 20                             | -             | [61]             |
| Graphene oxide                                                                                    | 397                        | 34.8                           | 25 min        | [62]             |
| Zn-DDQ                                                                                            | 135                        | 500                            | 70 min        | [63]             |
| MIL-100(Fe)                                                                                       | 736                        | 30                             | 90 min        | [64]             |
| ErCu-POM(Er-3)                                                                                    | 391                        | 20                             | -             | [65]             |
| <b>POM/CFO/MIL-101(Cr)</b>                                                                        | <b>200</b>                 | <b>100</b>                     | <b>23 min</b> | <b>This work</b> |
